# Supplementary material for: Predictive proteochemometric models for kinases derived from 3D protein field-based descriptors
Source: Royal Society of Chemistry journal article supplement (doi:10.1039/c5md00556f), 2016-01-01
Supplement: c5md00556f3.pdf [file c5md00556f3.pdf]

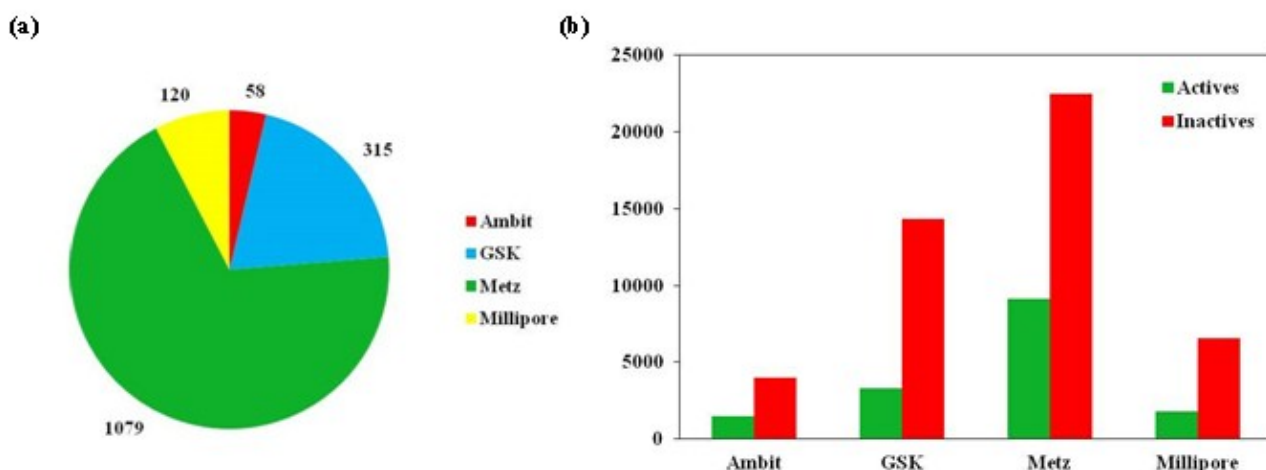

**Figure S1.** Distribution of the dataset (a) Pie chart representing the distribution of the ligands in different datasets (b) Bar plots showing the distribution of actives and inactives in each dataset

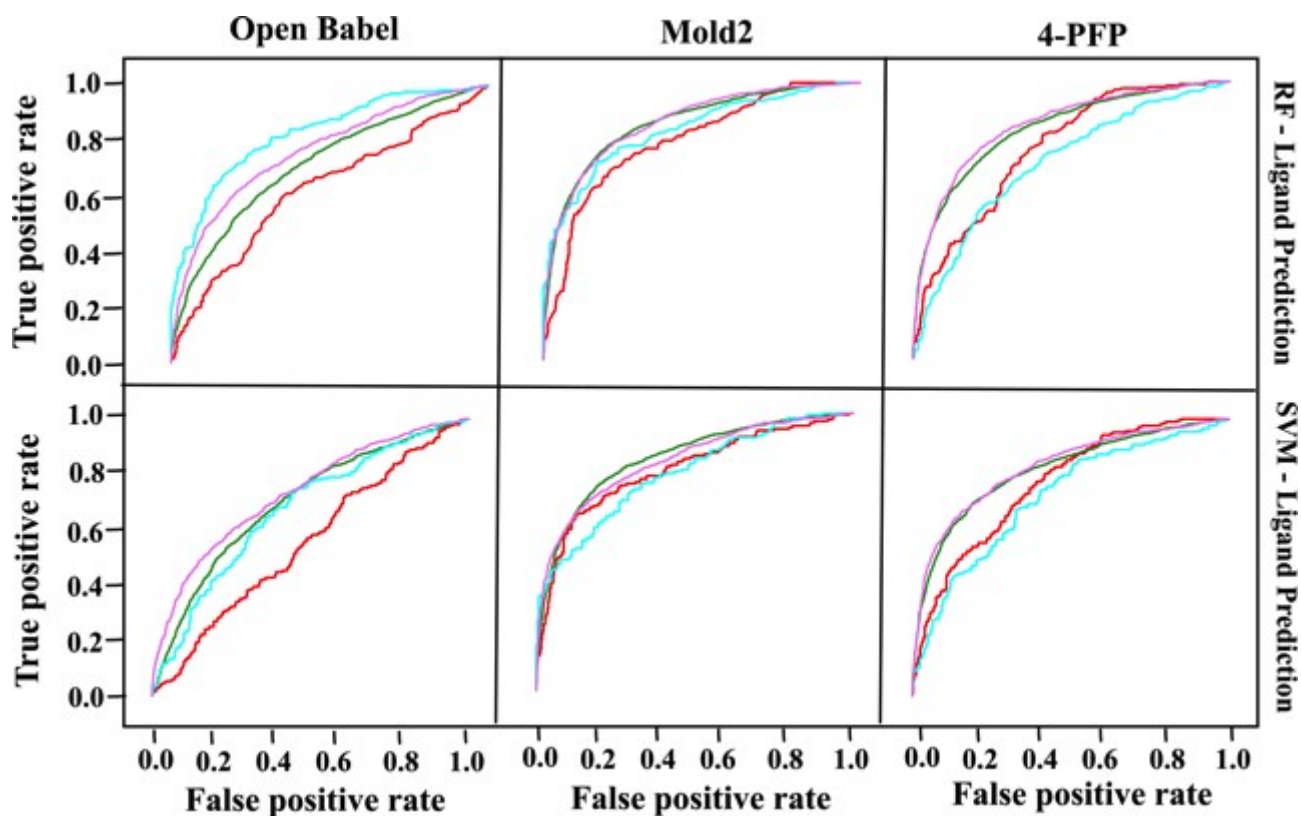

**Fig. S2** ROC curves showing the performances of proteochemometric (PCM) models based on different datasets, machine learning algorithms (RF – Random Forests and SVM – Support Vector Machines) and descriptors. Red, forest green, cyan and violet coloured curves correspond to the performances of Ambit, Metz, Millipore and GSK datasets.

**Table S1.** Experimental kinase inhibition data extracted from different sources

| Source                          | Interaction data                               | Inhibitors | Kinases | Data points |
|---------------------------------|------------------------------------------------|------------|---------|-------------|
| Karaman et al. <sup>a</sup>     | Dissociation constant [ $K_d$ ]                | 38         | 317     | 12046       |
| Metz et al. <sup>a</sup>        | Negative log of Inhibition constant [ $pK_i$ ] | 1497       | 172     | 107791      |
| Davis et al. <sup>a</sup>       | Dissociation constant [ $K_d$ ]                | 72         | 442     | 31824       |
| Kinase SARfari <sup>a</sup>     | Dissociation constant [ $K_d$ ]                | 2453       | 359     | 24351       |
| ChEMBL - GSK <sup>b</sup>       | Inhibition %                                   | 367        | 224     | 82208       |
| ChEMBL - Millipore <sup>a</sup> | Residual activity (%)                          | 158        | 234     | 36972       |

<sup>a</sup> Experimental measurements at 10  $\mu$ M concentration<sup>b</sup> Experimental measurements at 1  $\mu$ M concentration**Table S2.** Sigma and cost parameters used in training SVM models based on different ligand descriptors

| Descriptor                   | Sigma      | Cost |
|------------------------------|------------|------|
| <b>Ligand prediction set</b> |            |      |
| Open Babel                   | 0.0156250  | 20   |
| Mold2                        | 0.00390625 | 60   |
| 4 point pharm                | 0.00390625 | 40   |
| <b>Target prediction set</b> |            |      |
| Open Babel                   | 0.0156250  | 30   |
| Mold2                        | 0.00390625 | 70   |
| 4 point pharm                | 0.00390625 | 70   |

**Table S3.** Performance of proteochemometric (PCM) models in predicting activities of ligand test set. Sensitivity, specificity, accuracy percentage and Matthews coefficients resulting from PCM models based on different ligand descriptors and different machine learning approaches

| Ligand descriptors      | Method           | Sensitivity | Specificity | Accuracy | Matthews | Kappa | AUC  |
|-------------------------|------------------|-------------|-------------|----------|----------|-------|------|
| <b>Cross-validation</b> |                  |             |             |          |          |       |      |
| Open Babel              | SVM <sup>a</sup> | 0.53        | 0.91        | 0.81     | 0.47     | 0.47  | 0.83 |
|                         | RF <sup>b</sup>  | 0.41        | 0.96        | 0.82     | 0.48     | 0.44  | 0.86 |
| Mold2                   | SVM <sup>a</sup> | 0.62        | 0.91        | 0.84     | 0.56     | 0.56  | 0.87 |
|                         | RF <sup>b</sup>  | 0.43        | 0.96        | 0.83     | 0.5      | 0.47  | 0.88 |
| 4-PFP <sup>c</sup>      | SVM <sup>a</sup> | 0.58        | 0.92        | 0.84     | 0.54     | 0.54  | 0.86 |
|                         | RF <sup>b</sup>  | 0.43        | 0.96        | 0.83     | 0.49     | 0.46  | 0.87 |

| <b>External prediction</b> |                  |      |      |      |      |      |      |
|----------------------------|------------------|------|------|------|------|------|------|
| Open Babel                 | SVM <sup>a</sup> | 0.45 | 0.83 | 0.74 | 0.28 | 0.28 | 0.70 |
|                            | RF <sup>b</sup>  | 0.18 | 0.97 | 0.78 | 0.25 | 0.20 | 0.73 |
| Mold2                      | SVM <sup>a</sup> | 0.60 | 0.90 | 0.83 | 0.52 | 0.51 | 0.83 |
|                            | RF <sup>b</sup>  | 0.37 | 0.97 | 0.83 | 0.47 | 0.42 | 0.85 |
| 4-PFP <sup>c</sup>         | SVM <sup>a</sup> | 0.52 | 0.91 | 0.82 | 0.47 | 0.47 | 0.82 |
|                            | RF <sup>b</sup>  | 0.32 | 0.97 | 0.81 | 0.42 | 0.36 | 0.83 |

<sup>a</sup>Support Vector Machines <sup>b</sup>Random Forests <sup>c</sup>4 Point Pharmacophoric Fingerprints

**Table S4.** Performance of proteochemometric (PCM) models in predicting activities of target test set. Sensitivity, specificity, accuracy percentage and Matthews coefficients resulting from PCM models based on different ligand descriptors and different machine learning approaches.

| <b>Ligand descriptors</b>  | <b>Method</b>    | <b>Sensitivity</b> | <b>Specificity</b> | <b>Accuracy</b> | <b>Matthews</b> | <b>Kappa</b> | <b>AUC</b> |
|----------------------------|------------------|--------------------|--------------------|-----------------|-----------------|--------------|------------|
| <b>Cross-validation</b>    |                  |                    |                    |                 |                 |              |            |
| Open Babel                 | SVM <sup>a</sup> | 0.55               | 0.91               | 0.82            | 0.49            | 0.49         | 0.83       |
|                            | RF <sup>b</sup>  | 0.43               | 0.96               | 0.83            | 0.49            | 0.46         | 0.86       |
| Mold2                      | SVM <sup>a</sup> | 0.58               | 0.91               | 0.83            | 0.52            | 0.52         | 0.85       |
|                            | RF <sup>b</sup>  | 0.40               | 0.97               | 0.83            | 0.49            | 0.45         | 0.87       |
| 4-PFP <sup>c</sup>         | SVM <sup>a</sup> | 0.59               | 0.92               | 0.84            | 0.54            | 0.54         | 0.86       |
|                            | RF <sup>b</sup>  | 0.42               | 0.96               | 0.83            | 0.49            | 0.46         | 0.87       |
| <b>External prediction</b> |                  |                    |                    |                 |                 |              |            |
| Open Babel                 | SVM <sup>a</sup> | 0.98               | 0.01               | 0.74            | -0.01           | 0            | 0.48       |
|                            | RF <sup>b</sup>  | 0.30               | 0.97               | 0.80            | 0.39            | 0.34         | 0.82       |
| Mold2                      | SVM <sup>a</sup> | 0.10               | 0.90               | 0.70            | 0               | 0            | 0.51       |
|                            | RF <sup>b</sup>  | 0.33               | 0.97               | 0.81            | 0.42            | 0.37         | 0.83       |
| 4-PFP <sup>c</sup>         | SVM <sup>a</sup> | 0.11               | 0.83               | 0.65            | -0.06           | -0.06        | 0.51       |
|                            | RF <sup>b</sup>  | 0.33               | 0.97               | 0.81            | 0.41            | 0.36         | 0.82       |

<sup>a</sup>Support Vector Machines <sup>b</sup>Random Forests <sup>c</sup>4 Point Pharmacophoric Fingerprints

**Table S5.** Predictions of kinase targets resulting from internal cross-validation grouped according to the kinase families

| <b>Family</b> | <b>Number of kinases</b> | <b>Actives</b> | <b>Inactives</b> | <b>Sensitivity</b> | <b>Specificity</b> | <b>Accuracy</b> | <b>Matthews</b> | <b>AUC</b> |
|---------------|--------------------------|----------------|------------------|--------------------|--------------------|-----------------|-----------------|------------|
| AGC           | 5                        | 810            | 4055             | 0.23               | 0.97               | 0.87            | 0.32            | 0.84       |
| CAMK          | 11                       | 1792           | 4524             | 0.45               | 0.96               | 0.83            | 0.5             | 0.86       |
| CK            | 2                        | 483            | 1551             | 0.36               | 0.96               | 0.82            | 0.43            | 0.84       |
| CMGC          | 15                       | 3297           | 7353             | 0.39               | 0.94               | 0.81            | 0.4             | 0.82       |
| OPK           | 3                        | 81             | 406              | 0.2                | 0.95               | 0.85            | 0.34            | 0.83       |
| STE           | 11                       | 1093           | 4194             | 0.4                | 0.97               | 0.83            | 0.47            | 0.86       |
| TK            | 23                       | 4999           | 15817            | 0.37               | 0.96               | 0.83            | 0.44            | 0.87       |
| TKL           | 5                        | 209            | 638              | 0.4                | 0.94               | 0.82            | 0.4             | 0.83       |

**Table S6.** Predictions of kinase targets resulting from external test set validation, grouped according to the kinase families

| <b>Family</b> | <b>Number of kinases</b> | <b>Actives</b> | <b>Inactives</b> | <b>Sensitivity</b> | <b>Specificity</b> | <b>Accuracy</b> | <b>Matthews</b> | <b>AUC</b> |
|---------------|--------------------------|----------------|------------------|--------------------|--------------------|-----------------|-----------------|------------|
| CAMK          | 3                        | 417            | 1354             | 0.44               | 0.96               | 0.87            | 0.47            | 0.86       |
| CKI           | 1                        | 298            | 773              | 0.33               | 0.97               | 0.79            | 0.43            | 0.80       |
| CMGC          | 3                        | 142            | 707              | 0.41               | 0.94               | 0.86            | 0.42            | 0.82       |
| STE           | 5                        | 553            | 1909             | 0.37               | 0.97               | 0.82            | 0.43            | 0.82       |
| TK            | 7                        | 1426           | 3935             | 0.32               | 0.96               | 0.77            | 0.37            | 0.82       |
| TKL           | 1                        | 129            | 242              | 0.36               | 0.92               | 0.73            | 0.35            | 0.77       |

**Table S7.** Performance of proteochemometric (PCM) models in predicting activities of ligand test sets. AUC values resulting from cross-validation and external prediction are grouped according to the sources from which the ligands are extracted.

| Ligand descriptors | Method           | Cross-validation |      |           |      | External prediction |      |           |      |
|--------------------|------------------|------------------|------|-----------|------|---------------------|------|-----------|------|
|                    |                  | Ambit            | Metz | Millipore | GSK  | Ambit               | Metz | Millipore | GSK  |
| Open Babel         | SVM <sup>a</sup> | 0.83             | 0.82 | 0.84      | 0.84 | 0.55                | 0.70 | 0.67      | 0.73 |
|                    | RF <sup>b</sup>  | 0.86             | 0.85 | 0.89      | 0.86 | 0.62                | 0.72 | 0.82      | 0.76 |
| Mold2              | SVM <sup>a</sup> | 0.87             | 0.86 | 0.87      | 0.86 | 0.80                | 0.84 | 0.78      | 0.83 |
|                    | RF <sup>b</sup>  | 0.88             | 0.87 | 0.89      | 0.87 | 0.79                | 0.85 | 0.83      | 0.86 |
| 4-PFP <sup>c</sup> | SVM <sup>a</sup> | 0.87             | 0.85 | 0.87      | 0.85 | 0.77                | 0.81 | 0.72      | 0.82 |
|                    | RF <sup>b</sup>  | 0.88             | 0.86 | 0.89      | 0.87 | 0.76                | 0.83 | 0.71      | 0.84 |

**Table S8.** Performance of RF models based on different conformations of the ligands SKI-606 (Bosutinib) and TAE-684, whose x-ray structures are known. AUCs and Matthews (in parenthesis) resulting from internal cross-validation of the models and prediction probabilities of the active class are shown. PDB mentioned in the table corresponds to the conformation found in x-ray structure. Lowest, second lowest, medium and highest represent the conformations, ranked according to their energy values.

| Ligand conformation used in modelling | AUC (Matthews) | Prediction probabilities of the active class    |
|---------------------------------------|----------------|-------------------------------------------------|
| <b>SKI -606 (Bosutinib)</b>           |                |                                                 |
|                                       |                | <b>Interactions of SKI-606 with ABL1 kinase</b> |
| SKI-606 (PDB)                         | 0.87 (0.49)    | 0.52                                            |
| SKI-606 (lowest)                      | 0.87 (0.49)    | 0.58                                            |
| SKI-606 (second lowest)               | 0.86(0.48)     | 0.55                                            |
| SKI-606 (medium)                      | 0.86 (0.48)    | 0.50                                            |
| SKI-606 (highest)                     | 0.86 (0.47)    | 0.49                                            |
| <b>TAE-684</b>                        |                |                                                 |
|                                       |                | <b>Interactions of TAE-684 with ALK kinase</b>  |
| TAE-684 (PDB)                         | 0.87 (0.49)    | 0.82                                            |
| TAE-684 (lowest)                      | 0.87 (0.49)    | 0.81                                            |
| TAE-684 (second lowest)               | 0.86 (0.48)    | 0.81                                            |
| TAE-684 (medium)                      | 0.86 (0.48)    | 0.83                                            |
| TAE-684 (highest)                     | 0.86 (0.48)    | 0.76                                            |

**Table S9.** Prediction probabilities of the active class after excluding the fingerprints used for interpretation.

| Excluded pharmacophoric fingerprint | Ligand-kinase combination shown in interpretation | Prediction probabilities of the active class |                     |
|-------------------------------------|---------------------------------------------------|----------------------------------------------|---------------------|
|                                     |                                                   | With fingerprint                             | Without fingerprint |
| AARR                                | TAE-684 and ALK                                   | 0.81                                         | 0.29                |
| AAAR                                | TAE-684 and ALK                                   | 0.81                                         | 0.42                |
| AAAR                                | SKI-606 and ABL1                                  | 0.58                                         | 0.27                |
| ADRR                                | SKI-606 and ABL1                                  | 0.58                                         | 0.47                |
| AARR                                | Vandetanib and STK10                              | 0.63                                         | 0.52                |
| AAAR                                | Vandetanib and STK10                              | 0.63                                         | 0.49                |
| AADR                                | Vandetanib and STK10                              | 0.63                                         | 0.52                |
| ADRR                                | Vandetanib and STK10                              | 0.63                                         | 0.50                |
